# Supplementary material
Source: PubMed Central journal article supplement (PMC4426404)
Supplement: pnas.201419133SI.pdf [file pnas.201419133SI.pdf]

# Supporting Information

Douglas et al. 10.1073/pnas.1419133112

## SI Text

### Application of Multiple Homolog Mean Isotope Values

In most lake sediment samples, there are multiple plant wax homologs, i.e., plant waxes with different numbers of carbon atoms. Some studies have suggested that different plant taxa produce these plant waxes in different abundances (1, 2), but systematic taxonomic patterns are not well defined (3), and there is no consensus as to which homolog is the best indicator of hydroclimate change ( $\delta D_{\text{wax}}$ ) or vegetation change ( $\delta^{13}C_{\text{wax}}$ ).

In sediments from both Lake Chichancanab and Lake Salpeten, we observe substantial interhomolog variability in both  $\delta D$  and  $\delta^{13}C$ . In both cases, the  $C_{28}$  homolog is the most D-enriched,  $C_{26}$  is most D-depleted, and  $C_{30}$  typically has intermediate values (Tables S2 and S3). At both lakes, the  $C_{26}$  homolog is also typically the most  $^{13}C$  enriched, whereas differences between the  $C_{30}$  and  $C_{28}$  homologs in terms of  $\delta^{13}C$  values are less consistent between the two lakes (Tables S2 and S3). Interhomolog isotopic variability is evident in *n*-alkanoic acids from some plant extracts, but there are no clear patterns between plant taxa (4, 5). We suggest that the observed differences likely arise because of differences in the plant sources of these molecules. For instance, the high  $\delta^{13}C$  values of the  $C_{26}$  *n*-alkanoic acid homolog suggest it is likely to have a relatively large source from  $C_4$  grasses, whereas the  $C_{28}$  and  $C_{30}$  homologs likely have a larger source from  $C_3$  flora.

In this study, we focused on the mean  $\delta D$  and  $\delta^{13}C$  values of the  $C_{26}$ ,  $C_{28}$ , and  $C_{30}$  homologs for two reasons. First, because of sample size limitations, our plant wax radiocarbon analyses were conducted on combined samples of the  $C_{26}$ ,  $C_{28}$ ,  $C_{30}$ , and  $C_{32}$  homologs. There may be small differences in the ages of these individual homologs, and therefore it is appropriate to apply a mean stable isotope value when using these ages to understand the chronology of plant wax stable isotope records. The  $C_{32}$  homolog was not sufficiently abundant for accurate stable isotope measurement in many samples and is not included in mean  $\delta D_{\text{wax}}$  and  $\delta^{13}C_{\text{wax}}$  values. This homolog, however, represents a very small fraction of the compound-specific radiocarbon samples (typically less than 5%) and probably does not influence the age–depth models significantly.

Second, different *n*-alkanoic acid homologs likely vary in their dominant plant sources, which potentially differ in their D/H response to hydroclimate change. Because there is no good rationale for selecting a single homolog as the best indicator of climate or vegetation change, the mean  $\delta D$  and  $\delta^{13}C$  values of these homologs provide the most general indicator of past environmental change. Analyses of soils and lake surface sediments from southeastern Mexico and Guatemala indicate that mean  $\delta D_{\text{wax}}$  values are significantly correlated with climate variables, in many cases to a greater degree than  $\delta D$  values of individual homologs (6).

In this study, we did not analyze abundance-weighted mean isotope values, because there is substantial temporal variability in the relative abundance of the  $C_{26}$ ,  $C_{28}$ , and  $C_{30}$  homologs in these two cores. Because these homologs display large differences in their  $\delta D$  values, an abundance-weighted mean  $\delta D_{\text{wax}}$  record could be biased by variability in homolog relative abundance. In contrast, the unweighted mean value is not affected by homolog relative abundance. For consistency, we also applied unweighted mean  $\delta^{13}C_{\text{wax}}$  records. Whereas the isotopic values of individual homologs are offset from one another, they display similar temporal patterns that are consistent with the evidence for climatic and vegetation changes inferred from the mean  $\delta D_{\text{wax}}$  and  $\delta^{13}C_{\text{wax}}$  values.

### Accounting for Differences in $\delta D_{\text{wax}}$ Between Plant Groups

In addition to hydrological variables,  $\delta D_{\text{wax}}$  values can be influenced by differences in hydrogen isotope fractionation between different plant groups, with lower  $\delta D_{\text{wax}}$  in grasses than in trees and shrubs from the same environment (5, 7), and it is possible that vegetation change can bias the  $\delta D_{\text{wax}}$  record of climatic change (6). A recent study (8) proposed a method for applying  $\delta^{13}C_{\text{wax}}$  data to correct  $\delta D_{\text{wax}}$  records for vegetation change in tropical environments dominated by  $C_3$  trees and shrubs and  $C_4$  grasses. This method applies  $\epsilon_a$  (the apparent hydrogen isotope fractionation between plant-source water and plant waxes) values measured in  $C_3$  trees and shrubs and  $C_4$  grasses, as well as end-member  $\delta^{13}C_{\text{wax}}$  values for these two groups, to develop a vegetation-corrected  $\delta D_{\text{wax}}$  ( $\delta D_{\text{wax-corr}}$ ) value, using the following equations:

$$f_{c4} = \frac{\delta^{13}C_{\text{wax}} - \delta^{13}C_{c3}}{\delta^{13}C_{c4} - \delta^{13}C_{c3}} \quad [\text{S1}]$$

$$\epsilon_a = f_{c4}(\epsilon_{c4}) + (1 - f_{c4})(\epsilon_{c3}) \quad [\text{S2}]$$

$$\delta D_{\text{wax-corr}} = \left[ \frac{\delta D_{\text{wax}} + 1,000}{\left( \frac{\epsilon_a}{1,000} \right) + 1} \right] - 1,000 \quad [\text{S3}]$$

where  $f_{c4}$  is the estimated proportion of plant waxes derived from  $C_4$  plants,  $\delta^{13}C_{c3}$  and  $\delta^{13}C_{c4}$  are end-member  $\delta^{13}C_{\text{wax}}$  values for  $C_3$  trees and shrubs and  $C_4$  grasses, respectively, and  $\epsilon_{c3}$  and  $\epsilon_{c4}$  are end-member apparent D/H fractionation factors for  $C_3$  trees and shrubs and  $C_4$  grasses, respectively.

We slightly modified the calculations of ref. 8 to reflect that we analyze *n*-alkanoic acids as opposed to *n*-alkanes. To account for this difference, we applied  $\delta^{13}C_{c3}$  ( $-37.1 \pm 0.3\text{‰}$ ),  $\delta^{13}C_{c4}$  ( $-21.3 \pm 0.7\text{‰}$ ),  $\epsilon_{c3}$  ( $-94 \pm 4\text{‰}$ ), and  $\epsilon_{c4}$  ( $-122 \pm 4\text{‰}$ ) values based on measurements of *n*-alkanoic acids in  $C_3$  trees and  $C_4$  grasses from East Asia (5), the only study that has compared *n*-alkanoic acid isotope values in  $C_3$  and  $C_4$  plants grown with water of known isotopic composition. We calculated these end-member values as the mean of the  $C_{26}$ ,  $C_{28}$ , and  $C_{30}$  homologs in that study. The listed errors are 1 $\sigma$  SEM. We calculated a combined error for  $\delta D_{\text{wax-corr}}$  values of  $\pm 7\text{‰}$  using a Monte Carlo method in Matlab that incorporated errors for the end-member values listed above, as well as analytical error for  $\delta D_{\text{wax}}$  (5‰) and  $\delta^{13}C_{\text{wax}}$  (0.5‰). The error for  $\delta D_{\text{wax-corr}}$  is insensitive to  $\delta D_{\text{wax}}$  and  $\delta^{13}C_{\text{wax}}$  values.

$\delta D_{\text{wax-corr}}$  values roughly approximate the  $\delta D$  composition of plant water, although further study is required to assess how closely they approximate this value. Regardless,  $\delta D_{\text{wax-corr}}$  values provide an indication of  $\delta D_{\text{wax}}$  variability that accounts for the influence of vegetation change. This technique is only applicable in environments where  $C_3$  trees and shrubs and  $C_4$  grasses are the dominant plant groups, and  $C_3$  grasses and CAM plants are not abundant, as is the case in many low-elevation tropical regions with subarid to humid climates, including the Maya lowlands (9).

Applying the vegetation correction described above to the Lake Chichancanab and Lake Salpeten sediment cores, although shifting the overall  $\delta D$  value, does not produce an appreciably different record of climate variability (Fig. S1). This is because of the relatively modest degree of  $\delta^{13}C_{\text{wax}}$  variability in these cores ( $<4\text{‰}$ ), which indicates shifts in the relative abundance of  $C_3$

and C<sub>4</sub> plants on the order of 20–30%, combined with large  $\delta D_{\text{wax}}$  variability (40–50‰).

### $\delta^{13}\text{C}_{\text{wax}}$ as a Recorder of Ancient Maya Land Use

The  $\delta^{13}\text{C}$  of plant waxes is strongly determined by the carbon isotope composition of bulk plant tissue (1, 2, 5). In the Maya Lowlands, where the dominant natural vegetation is C<sub>3</sub> angiosperm forest, but where there are large amounts of C<sub>4</sub> grasses (9), especially under circumstances of human disturbance, the relative proportion of C<sub>3</sub> to C<sub>4</sub> plants is the dominant control on  $\delta^{13}\text{C}_{\text{wax}}$  values in lake sediments (10). The  $\delta^{13}\text{C}_{\text{wax}}$  has similarly been applied as a robust indicator of the relative abundance of C<sub>3</sub> and C<sub>4</sub> plants in other tropical locations (11, 12).

In many natural settings, the relative abundance of C<sub>4</sub> grasses is largely controlled by climate, because C<sub>4</sub> plants have a competitive advantage over trees and shrubs under hot, dry conditions. In fact, glacial-to-interglacial  $\delta^{13}\text{C}_{\text{wax}}$  from a number of locations, including the Maya Lowlands, have shown a strong dependence on climate (10, 11). Under ancient Maya land use regimes, however, climatic controls on C<sub>3</sub>/C<sub>4</sub> vegetation dynamics are likely to have been diminished. The ancient Maya cleared large areas of C<sub>3</sub> deciduous and evergreen tropical forest, which led to a large increase in the abundance of C<sub>4</sub> grasses and other disturbance taxa (13, 14). Most palynological studies in the Maya Lowlands have found that human land use, as opposed to climate change, was the dominant driver of vegetation cover change during the late Holocene (13, 15). Furthermore, the staple crop of the ancient Maya was maize, a C<sub>4</sub> grass, and ancient agricultural settings in the Maya lowlands exhibit strong  $\delta^{13}\text{C}$  enrichment of soil organic carbon (16, 17). Therefore, the relative abundance of C<sub>4</sub> plants, inferred from  $\delta^{13}\text{C}_{\text{wax}}$  measurements, is interpreted primarily as an indicator of ancient Maya land use.

The transport pathways for plant waxes from terrestrial ecosystems to lake sediment are not well constrained. Analyses of  $\delta D_{\text{wax}}$  and plant wax radiocarbon ages ( $\Delta^{14}\text{C}_{\text{wax}}$ ) in Lake Chichancanab sediments and catchment soils (18), however, indicate that in karst regions of the Maya Lowlands, they are primarily transported from catchment soils. The relatively old  $^{14}\text{C}$  ages of plant waxes in lake surface sediments from the Maya Lowlands specifically argue against significant atmospheric input from aerosols (18). This means that sedimentary plant waxes are largely derived from within the lake catchment, and that  $\delta^{13}\text{C}_{\text{wax}}$  values provide a local, catchment-integrated record of vegetation change. This is an important consideration in the context of the Maya Lowlands, where human land use led to high spatial variability in vegetation patterns (19, 20).

The ancient Maya practiced a wide range of land use strategies, including swidden agriculture, terraced upland agriculture, wetland agriculture, agroforestry, and garden orchards (19–22). Abundances of C<sub>4</sub> plants in the Lake Chichancanab and Lake Salpeten sediment cores were likely controlled by the spatial coverage of upland agriculture within the lake catchments. These two catchments do not contain sizeable wetlands aside from the lakes themselves and are therefore unlikely to have captured large amounts of plant waxes originating from wetland agricultural sites. Changes in the amount of land used for upland staple crop agriculture, which typically involves the burning or clearing of forests and their replacement with largely C<sub>4</sub> crops (19, 20), would probably account for the strongest signal of relative abundance of C<sub>4</sub> plants. Other land uses that emphasize C<sub>3</sub> plants, such as agroforestry or orchards (23, 24), would be less likely to affect the  $\delta^{13}\text{C}_{\text{wax}}$  signal with respect to natural vegetation.

Archaeological and sedimentological data both indicate a much larger human presence at Lake Salpeten than at Lake Chichancanab, in terms of both the number of ancient residential structures surveyed (25) and the evidence for major anthropogenic soil erosion in the Lake Salpeten sediments (26), which is not present in Lake Chichancanab sediments (27). The presence

of *Zea* pollen in a low-resolution palynological record from Lake Chichancanab, however, indicates maize agriculture did occur in its catchment (15). The similar  $\delta^{13}\text{C}_{\text{wax}}$  records between the two catchments suggest that human land use effects on the abundance of C<sub>4</sub> plants were similar between the two catchments, despite the evidence for larger populations surrounding Lake Salpeten. This pattern is consistent with extensive swidden agriculture conducted by low-density populations leading to enhanced C<sub>4</sub> plant growth in both catchments during the Preclassic Period.

The palynological record from Lake Salpeten (14) provides a valuable comparison with the  $\delta^{13}\text{C}_{\text{wax}}$  record from this lake (Fig. S4), although the pollen record has relatively low temporal resolution. The pollen record from Lake Salpeten has been interpreted as indicating a large increase in disturbance taxa, including grasses and weeds associated with anthropogenic deforestation, beginning in the early Preclassic period and lasting through the Terminal Classic, with a return to dominance of tropical forest taxa during the Postclassic period (14, 26, 28). This interpretation is partially at odds with the  $\delta^{13}\text{C}_{\text{wax}}$  record, which indicates a decrease in C<sub>4</sub> plants during the Early Classic period, much earlier than the decline in disturbance taxa pollen. When the disturbance taxa are disaggregated, however, it is apparent that *Poaceae* (grass) pollen, the family accounting for most C<sub>4</sub> plants in the region, began to decline in the Late Preclassic (Fig. S4B). Given the low resolution of the pollen data, this decrease in *Poaceae* is consistent with evidence for decreasing C<sub>4</sub> plants in the Classic Period from the  $\delta^{13}\text{C}_{\text{wax}}$  record. In contrast, other disturbance taxa such as *Asteraceae* and *Ambrosia*, which are dominantly C<sub>3</sub> plants, increased in abundance through the Classic period (Fig. S4 C and D). One explanation for these patterns, consistent with both the  $\delta^{13}\text{C}_{\text{wax}}$  record and population estimates, is that during the Classic period, the predominant land use in the Lake Salpeten catchment shifted from low-population-density swidden agriculture, which promoted grasses, to higher-population-density residential land use that promoted the growth of C<sub>3</sub> disturbance flora including *Asteraceae* and *Ambrosia*.

*Zea* (maize) pollen is also present in Salpeten sediments in horizons spanning the late Preclassic to early Classic, including the period of minimum  $\delta^{13}\text{C}_{\text{wax}}$  values (Fig. S4B). There are two key points in interpreting the presence of *Zea* pollen. First, *Zea* pollen is not abundant in the sediment core, and although its presence indicates maize agriculture, it does not provide strong evidence for the abundance of maize in the catchment (29). Second, *Zea* pollen grains have a relatively short transport distance (~200 m) (30, 31) and therefore primarily represent maize production close to the lake. We suggest that the continued presence of maize pollen in the lake sediments during the Classic period, concurrent with evidence for an overall decrease in C<sub>4</sub> plants in the lake catchment, suggests that maize agriculture did continue in the Salpeten basin, but at lower levels than occurred during the Preclassic. Maize cultivation in the catchment may have shifted from the hillslopes to the lakeshore during the Classic, a shift that could have enhanced the preservation of maize pollen in the lake sediments even as overall catchment C<sub>4</sub> plant abundance declined. This scenario would be consistent with the adoption of water-conservative agriculture in the Classic period, as agriculture near the lakeshore would have been better able to access the perched aquifer that feeds the lake, than would crops grown on the catchment hillslopes.

### Age–Depth Models for Plant Wax Stable Isotope Records

Sediments from both Lakes Chichancanab and Salpeten contain a large proportion of pre-aged plant waxes, as indicated by plant wax  $^{14}\text{C}$  ( $^{14}\text{C}_{\text{wax}}$ ) ages that are significantly older than the age of sediment deposition based on  $^{14}\text{C}$  dating of terrigenous macrofossils (Fig. 3). This age offset poses a complication for reconstructing past changes in plant wax stable isotope values,

because terrigenous macrofossil (TM) age–depth models do not correspond to the time that the plant waxes were synthesized and their stable isotope values were recorded.

We addressed this complication by applying plant wax (PW) age–depth models that rely on compound-specific radiocarbon ages, as discussed in the Introduction. There are only two brief intervals in the upper meter of the Lake Salpeten sediment core in which the 95% confidence intervals of the PW and TM age models overlap (Fig. 3). The  $^{14}\text{C}_{\text{wax}}$  ages in the Lake Salpeten core change by only 20 y between 262 cm and 147 cm depth, suggesting that the age of deposited plant waxes is essentially invariant across this stratigraphic interval, which was a time of very rapid sediment deposition (Fig. 3). Applying the PW age model to  $\delta\text{D}_{\text{wax-corr}}$  and  $\delta^{13}\text{C}_{\text{wax}}$  data from this interval of the sediment core results in data with very high temporal resolution (Fig. S2B) whose interpretation is relatively uncertain in the context of this study. We do not include these data in our analysis of  $\delta\text{D}_{\text{wax-corr}}$  and  $\delta^{13}\text{C}_{\text{wax}}$  records of past environmental change, which is focused on centennial-scale variability.

To assess the ability of the Lake Salpeten PW and TM age–depth models to accurately reflect the chronology of plant wax stable isotope variability, we compared  $\delta\text{D}_{\text{wax-corr}}$  records fit to both of these age models with  $\delta^{18}\text{O}$  records from Lake Salpeten (28) and the nearby Yok I speleothem from Belize (32) (Fig. S2). The  $\delta\text{D}_{\text{wax}}$  record fit to the PW age model (Fig. S2B) is in broad agreement with centennial climate variability evident in the Yok I speleothem  $\delta^{18}\text{O}$  record (Fig. S2C). In contrast, the  $\delta\text{D}_{\text{wax}}$  record fit to the TM age model (Fig. S2A) is temporally offset from the Yok I speleothem  $\delta^{18}\text{O}$  record.

The  $\delta\text{D}_{\text{wax}}$  record fit to the PW age model also records long-term trends toward wetter conditions from 3,200 y B.P. to 2,200 y B.P. and toward drier conditions from 1,800 y B.P. to 1,000 y B.P. that are apparent in the Lake Salpeten  $\delta^{18}\text{O}$  record (Fig. S2D). The  $\delta\text{D}_{\text{wax-corr}}$  record fit to the TM age model, in contrast, records

a trend toward wetter conditions from 2,000 y B.P. to 1,200 y B.P. that does not agree with the Lake Salpeten  $\delta^{18}\text{O}$  record. Although the Lake Salpeten  $\delta^{18}\text{O}$  record has been interpreted to have been partially controlled by changes in runoff caused by anthropogenic deforestation and afforestation, it is likely that long-term trends in this record are in large part a consequence of changes in the ratio of evaporation to precipitation (28). In particular, the trend toward elevated  $\delta^{18}\text{O}$  values beginning at  $\sim 200$  C.E. precedes pollen evidence for afforestation by at least 500 y (28), suggesting that it primarily reflects climatic change.

Similar results are found for Lake Chichancanab, with the  $\delta\text{D}_{\text{wax}}$  record fit to the PW age model providing a better fit to regional proxy records for hydroclimate from the northern Maya Lowlands (18). We also conducted an inverse modeling exercise to determine which plant wax age distributions provided the best fit between  $\delta\text{D}_{\text{wax}}$  and the 7,500-y gastropod  $\delta^{18}\text{O}$  record from Lake Chichancanab (27). The best correspondence between these two records is achieved with plant wax age distributions in which the majority (>80%) of plant waxes are cycled on millennial time scales and the age variance of this millennially cycled pool of plant waxes is relatively small (<200 y) (18). This age distribution is consistent with the PW age model providing an accurate record of past  $\delta\text{D}_{\text{wax}}$  variability on millennial and centennial time scales.

Because of the lack of high-resolution, long-term (i.e., >3,500 y) climate records from the southern Maya Lowlands, the inverse modeling approach applied at Lake Chichancanab is not feasible at Lake Salpeten. Nevertheless, the Lake Chichancanab and Lake Salpeten catchments are both characterized by karst hydrology, and plant wax transport pathways and age distributions for the two lakes are probably similar. Furthermore, the presence of high-amplitude  $\delta\text{D}_{\text{wax}}$  variability in records from both lakes (18) (Fig. S2B) provides a strong argument against significant mixing of plant waxes of different ages and further supports the application of PW age models.

- Rommerskirchen F, Plader A, Eglinton G, Chikaraishi Y, Rullkotter J (2006) Chemotaxonomic significance of distribution and stable carbon isotopic composition of long-chain alkanes and alkan-1-ols in C-4 grass waxes. *Org Geochem* 37(10):1303–1332.
- Vogts A, Moossen H, Rommerskirchen F, Rullkotter J (2009) Distribution patterns and stable carbon isotopic composition of alkanes and alkan-1-ols from plant waxes of African rain forest and savanna C-3 species. *Org Geochem* 40(10):1037–1054.
- Bush RT, McInerney FA (2013) Leaf wax n-alkane distributions in and across modern plants: Implications for paleoecology and chemotaxonomy. *Geochim Cosmochim Acta* 117:161–179.
- Chikaraishi Y, Naraoka H (2007)  $\delta^{13}\text{C}$  and  $\delta\text{D}$  relationships among three n-alkyl compound classes (n-alkanoic acid, n-alkane and n-alkanol) of terrestrial higher plants. *Org Geochem* 38(2):198–215.
- Chikaraishi Y, Naraoka H, Poulson SR (2004) Hydrogen and carbon isotopic fractionations of lipid biosynthesis among terrestrial (C3, C4 and CAM) and aquatic plants. *Phytochemistry* 65(10):1369–1381.
- Douglas PMJ, Pagani M, Brenner M, Hodell DA, Curtis JH (2012) Aridity and vegetation composition are important determinants of leaf-wax  $\delta\text{D}$  values in southeastern Mexico and Central America. *Geochim Cosmochim Acta* 97:24–45.
- Sachse D, et al. (2012) Molecular paleohydrology: Interpreting the hydrogen-isotopic composition of lipid biomarkers from photosynthesizing organisms. *Annu Rev Earth Planet Sci* 40:221–249.
- Collins JA, et al. (2013) Estimating the hydrogen isotopic composition of past precipitation using leaf-waxes from western Africa. *Quat Sci Rev* 65:88–101.
- Sage RF, Wedin DA, Li M (1999) The biogeography of C4 photosynthesis: Patterns and controlling factors. *C4 Plant Biology*, eds Sage RF, Monson RK (Academic, San Diego), pp 313–373.
- Huang Y, et al. (2001) Climate change as the dominant control on glacial-interglacial variations in C3 and C4 plant abundance. *Science* 293(5535):1647–1651.
- Hughen KA, Eglinton TI, Xu L, Makou M (2004) Abrupt tropical vegetation response to rapid climate changes. *Science* 304(5679):1955–1959.
- Huang YS, Dupont L, Sarnthein M, Hayes JM, Eglinton G (2000) Mapping of C4 plant input from North West Africa into North East Atlantic sediments. *Geochim Cosmochim Acta* 64(20):3505–3513.
- Wahl D, Byrne R, Schreiner T, Hansen R (2006) Holocene vegetation change in the northern Peten and its implications for Maya prehistory. *Quat Res* 65(3):380–389.
- Leyden BW (1987) Man and climate in the Maya Lowlands. *Quat Res* 28(3):407–417.
- Leyden BW (2002) Pollen evidence for climatic variability and cultural disturbance in the Maya lowlands. *Ancient Mesoam* 13(1):85–101.
- Beach T, et al. (2011) Carbon isotopic ratios of wetland and terrace soil sequences in the Maya Lowlands of Belize and Guatemala. *Catena* 85(2):109–118.
- Webb EA, et al. (2007) Stable carbon isotope signature of ancient maize agriculture in the soils of Motul de San Jose, Guatemala. *Geoarchaeology* 22(3):291–312.
- Douglas PMJ, et al. (2014) Pre-aged plant waxes in tropical lake sediments and their influence on the chronology of molecular paleoclimate proxy records. *Geochim Cosmochim Acta* 141:346–364.
- Turner BL, II, Sabloff JA (2012) Classic Period collapse of the Central Maya Lowlands: Insights about human-environment relationships for sustainability. *Proc Natl Acad Sci USA* 109(35):13908–13914.
- Dunning NP, Beach T (2011) Farms and forests: Spatial and temporal perspectives on ancient Maya landscapes. *Landscapes and Societies*, eds Martini IP, Chesworth W (Springer, Dordrecht, The Netherlands), pp 369–389.
- Dunning NP, et al. (2002) Arising from the bajos: The evolution of a neotropical landscape and the rise of Maya civilization. *Ann Assoc Am Geol* 92(2):267–283.
- Turner BL, II (1974) Prehistoric intensive agriculture in the Mayan Lowlands. *Science* 185(4146):118–124.
- Lentz DL, Hockaday B (2009) Tikal timbers and temples: Ancient Maya agroforestry and the end of time. *J Archaeol Sci* 36(7):1342–1353.
- Ross NJ (2011) Modern tree species composition reflects ancient Maya “forest gardens” in northwest Belize. *Ecol Appl* 21(1):75–84.
- Rice DS, Rice PM (1990) Population size and population change in the central Peten lakes region, Guatemala. *Pre-Columbian Population History in the Maya Lowlands*, eds Culbert TP, Rice DS (Univ New Mexico Press, Albuquerque), pp 123–148.
- Anselmetti FS, Hodell DA, Ariztegui D, Brenner M, Rosenmeier MF (2007) Quantification of soil erosion rates related to ancient Maya deforestation. *Geology* 35(10):915–918.
- Hodell DA, Curtis JH, Brenner M (1995) Possible role of climate in the collapse of Classic Maya civilization. *Nature* 375(6530):391–394.
- Rosenmeier MF, Hodell DA, Brenner M, Curtis JH, Guilderson TP (2002) A 4000-year lacustrine record of environmental change in the southern Maya lowlands, Peten, Guatemala. *Quat Res* 57(2):183–190.
- Taylor Z, Horn S, Finkelstein D (2013) Maize pollen concentrations in Neotropical lake sediments as an indicator of the scale of prehistoric agriculture. *Holocene* 23(1):78–84.
- Luna V, et al. (2001) Maize pollen longevity and distance isolation requirements for effective pollen control. *Crop Sci* 41(5):1551–1557.
- Lane CS, Cummings KE, Clark JJ (2010) Maize pollen deposition in modern lake sediments: A case study from Northeastern Wisconsin. *Rev Palaeobot Palynol* 159(3):177–187.
- Kennett DJ, et al. (2012) Development and disintegration of Maya political systems in response to climate change. *Science* 338(6108):788–791.















Table S2. Cont.

| Depth, cm | TM age 95% CI lower | TM age best, y B.P. | TM age 95% CI upper | PW age 95% CI lower | PW age best, y B.P. | PW age 95% CI upper | $\delta^{13}\text{C}$ C26, ‰ | $\delta^{13}\text{C}$ C28, ‰ | $\delta^{13}\text{C}$ C30, ‰ | $\delta^{13}\text{C}$ mean, ‰ | $f_{\text{C4}}$ | $\delta\text{D}$ C26, ‰ | $\delta\text{D}$ C28, ‰ | $\delta\text{D}$ C30, ‰ | $\delta\text{D}$ mean, ‰ | $\epsilon_{\text{a}}$ , ‰ | $\delta\text{D}$ wax-corr, ‰ |
|-----------|---------------------|---------------------|---------------------|---------------------|---------------------|---------------------|------------------------------|------------------------------|------------------------------|-------------------------------|-----------------|-------------------------|-------------------------|-------------------------|--------------------------|---------------------------|------------------------------|
| 142.5     | 1558                | 1634                | 1702                | 2658                | 2754                | 2868                | -27.6                        | -29.4                        | -28.3                        | -28.5                         | 0.55            | -150                    | -111                    | -131                    | -131                     | -109                      | -24                          |
| 146.5     | 1601                | 1676                | 1745                | 2767                | 2867                | 2986                | -29.8                        | -31.3                        | -29.8                        | -30.3                         | 0.43            | -154                    | -121                    | -136                    | -137                     | -106                      | -35                          |
| 156.5     | 1699                | 1776                | 1843                | 2794                | 2890                | 3009                | -29.2                        | -31.0                        | -30.5                        | -30.2                         | 0.43            | -141                    | -110                    | -133                    | -128                     | -106                      | -24                          |
| 160.5     | 1735                | 1812                | 1879                | 2798                | 2894                | 3012                | -30.1                        | -31.8                        | -30.2                        | -30.7                         | 0.40            | -133                    | -106                    | -131                    | -124                     | -105                      | -20                          |
| 167.5     | 1796                | 1873                | 1942                | 2805                | 2900                | 3019                | -29.8                        | -31.5                        | -31.4                        | -30.9                         | 0.39            | -139                    | -108                    | -122                    | -123                     | -105                      | -20                          |
| 174.5     | 1850                | 1929                | 2000                | 2810                | 2907                | 3027                | -28.6                        | -30.6                        | -29.8                        | -29.6                         | 0.47            | -132                    | -102                    | -120                    | -118                     | -107                      | -12                          |
| 181.5     | 1902                | 1980                | 2054                | 2814                | 2913                | 3032                | -31.9                        | -30.9                        | -31.9                        | -31.6                         | 0.35            | -134                    | -113                    | -125                    | -124                     | -104                      | -23                          |
| 188.5     | 1950                | 2027                | 2098                | 2819                | 2920                | 3038                | -28.3                        | -30.7                        | -30.0                        | -29.7                         | 0.47            | -133                    | -110                    | -128                    | -124                     | -107                      | -19                          |
| 195.5     | 1995                | 2070                | 2141                | 2823                | 2926                | 3046                | -29.0                        | -31.3                        | -30.0                        | -30.1                         | 0.44            | -137                    | -107                    | -124                    | -122                     | -106                      | -18                          |
| 202.5     | 2037                | 2109                | 2180                | 2827                | 2932                | 3056                | -27.9                        | -30.3                        | -29.4                        | -29.2                         | 0.50            | -133                    | -107                    | -121                    | -120                     | -108                      | -14                          |
| 209.5     | 2076                | 2146                | 2216                | 2831                | 2939                | 3066                | -28.2                        | -30.5                        | -29.3                        | -29.3                         | 0.49            | -134                    | -113                    | -124                    | -123                     | -108                      | -17                          |
| 216.5     | 2113                | 2179                | 2249                | 2834                | 2945                | 3076                | -28.7                        | -31.0                        | -30.2                        | -30.0                         | 0.45            | -149                    | -122                    | -134                    | -135                     | -107                      | -32                          |
| 225.5     | 2158                | 2220                | 2289                | 2838                | 2954                | 3091                | -29.4                        | -31.7                        | -30.5                        | -30.5                         | 0.42            | -139                    | -114                    | -123                    | -125                     | -106                      | -22                          |
| 237.5     | 2209                | 2272                | 2341                | 2844                | 2965                | 3112                | -28.3                        | -31.0                        | -29.5                        | -29.6                         | 0.48            | -141                    | -100                    | -125                    | -122                     | -107                      | -17                          |
| 244.5     | 2238                | 2302                | 2375                | 2846                | 2971                | 3125                | -28.6                        | -30.3                        | -30.2                        | -29.7                         | 0.47            | -143                    | -94                     | -129                    | -122                     | -107                      | -17                          |
| 251.5     | 2268                | 2335                | 2408                | 2849                | 2978                | 3140                | -30.5                        | -31.4                        | -32.4                        | -31.4                         | 0.36            | -128                    | -99                     | -111                    | -113                     | -104                      | -10                          |
| 259.5     | 2305                | 2375                | 2451                | 2852                | 2985                | 3156                | -28.4                        | -30.7                        | -29.4                        | -29.5                         | 0.48            | -145                    | -109                    | -131                    | -128                     | -107                      | -23                          |
| 265.5     | 2339                | 2409                | 2483                | 2948                | 3077                | 3245                | -28.0                        | -29.9                        | -28.3                        | -28.7                         | 0.53            | -150                    | -121                    | -139                    | -137                     | -109                      | -31                          |
| 269.5     | 2362                | 2434                | 2508                | 3056                | 3180                | 3340                | -28.3                        | -29.5                        | -28.4                        | -28.8                         | 0.53            | -153                    | -120                    | -144                    | -139                     | -109                      | -34                          |
| 272.5     | 2380                | 2453                | 2529                | 3137                | 3257                | 3412                | -28.6                        | -31.0                        | -28.9                        | -29.5                         | 0.48            | -133                    | -92                     | -118                    | -114                     | -108                      | -8                           |
| 276.5     | 2406                | 2481                | 2557                | 3245                | 3360                | 3507                | -28.8                        | -30.0                        | -29.4                        | -29.4                         | 0.49            | -146                    | -106                    | -131                    | -128                     | -108                      | -22                          |
| 279.5     | 2428                | 2504                | 2580                | 3325                | 3437                | 3579                | -27.9                        | -29.9                        | -28.8                        | -28.9                         | 0.52            | -148                    | -106                    | -139                    | -131                     | -109                      | -25                          |
| 283.5     | 2460                | 2536                | 2610                | 3432                | 3540                | 3675                | -28.7                        | -29.9                        | -28.7                        | -29.1                         | 0.51            | -144                    | -100                    | -129                    | -124                     | -108                      | -18                          |
| 286.5     | 2487                | 2562                | 2637                | 3513                | 3618                | 3750                | -27.9                        | -30.3                        | -28.9                        | -29.0                         | 0.51            | -132                    | -91                     | -124                    | -116                     | -108                      | -8                           |
| 288.5     | 2505                | 2580                | 2654                | 3567                | 3669                | 3800                | -29.7                        | -31.3                        | -30.4                        | -30.5                         | 0.42            | -146                    | -111                    | -136                    | -131                     | -106                      | -28                          |
| 290.5     | 2524                | 2599                | 2674                | 3621                | 3720                | 3852                | -29.0                        | -29.4                        | -28.9                        | -29.1                         | 0.51            | -131                    | -113                    | -138                    | -127                     | -108                      | -21                          |
| 293.5     | 2554                | 2630                | 2703                | 3700                | 3798                | 3929                | -27.9                        | -29.1                        | -29.0                        | -28.7                         | 0.53            | -129                    | -87                     | -119                    | -112                     | -109                      | -3                           |
| 297.5     | 2599                | 2673                | 2744                | 3805                | 3901                | 4037                | -28.5                        | -30.1                        | -28.5                        | -29.1                         | 0.51            | -149                    | -120                    | -140                    | -136                     | -108                      | -31                          |
| 301.5     | 2647                | 2720                | 2789                | 3911                | 4003                | 4148                | -28.0                        | -30.4                        | -29.1                        | -29.2                         | 0.50            | -142                    | -103                    | -124                    | -123                     | -108                      | -17                          |
| 304.5     | 2686                | 2759                | 2825                | 3989                | 4081                | 4232                | -29.9                        | -30.2                        | -29.7                        | -29.9                         | 0.46            | -148                    | -122                    | -149                    | -140                     | -107                      | -37                          |
| 307.5     | 2726                | 2799                | 2866                | 4067                | 4158                | 4318                | -28.6                        | -31.0                        | -29.3                        | -29.6                         | 0.47            | -148                    | -118                    | -146                    | -137                     | -107                      | -34                          |
| 311.5     | 2787                | 2858                | 2923                | 4170                | 4261                | 4432                | -28.9                        | -29.9                        | -29.3                        | -29.4                         | 0.49            | -150                    | -111                    | -139                    | -133                     | -108                      | -29                          |
| 314.5     | 2836                | 2905                | 2968                | 4248                | 4338                | 4517                | -29.1                        | -31.0                        | -29.6                        | -29.9                         | 0.45            | -146                    | -105                    | -126                    | -125                     | -107                      | -21                          |
| 323.5     | 3000                | 3064                | 3133                | 4480                | 4569                | 4775                | -28.2                        | -30.3                        | -29.3                        | -29.2                         | 0.50            | -142                    | -101                    | -127                    | -123                     | -108                      | -17                          |
| 328.5     | 3109                | 3169                | 3246                | 4606                | 4698                | 4919                | -28.9                        | -30.1                        | -30.3                        | -29.8                         | 0.46            | -157                    | -112                    | -135                    | -135                     | -107                      | -31                          |
| 335.5     | 3265                | 3325                | 3424                | 4781                | 4878                | 5115                | -28.6                        | -29.6                        | -29.6                        | -29.3                         | 0.49            | -167                    | -102                    | -132                    | -134                     | -108                      | -29                          |
| 340.5     | 3384                | 3453                | 3571                |                     |                     |                     | -28.1                        | -28.9                        | -28.4                        | -28.5                         | 0.55            | -163                    | -107                    | -136                    | -135                     | -109                      | -29                          |
| 342.5     | 3433                | 3507                | 3629                |                     |                     |                     | -29.0                        | -29.3                        | -28.8                        | -29.0                         | 0.51            | -154                    | -109                    | -137                    | -134                     | -108                      | -28                          |
| 348.5     |                     |                     |                     |                     |                     |                     | -28.6                        | -29.4                        | -29.2                        | -29.1                         | 0.51            | -163                    | -101                    | -129                    | -131                     | -108                      | -26                          |

Italics indicate core interval with minimal change in the PW age model. These data are not interpreted in terms of past environmental change. CI, confidence interval.

Table S3. Compound-specific radiocarbon results from Lake Salpeten

| NOSAMS sample number | Sediment core depth, cm | $\Delta^{14}\text{C}_{\text{wax}}$ , ‰ | Error, ‰ | 2 $\sigma$ lower Cal age, y B.P. | Median Cal age, y B.P. | 2 $\sigma$ upper Cal age, y B.P. | $\delta^{13}\text{C}_{\text{CO}_2}$ , ‰ | $\delta^{13}\text{C}_{\text{GC-IRMS}}$ , ‰ |
|----------------------|-------------------------|----------------------------------------|----------|----------------------------------|------------------------|----------------------------------|-----------------------------------------|--------------------------------------------|
| 88449                | 0.5–5.5                 | -8                                     | 18       | -5                               | 161                    | 426                              | -32.9                                   |                                            |
| 88551                | 23.5–25.5               | -76                                    | 10       | 523                              | 609                    | 697                              | -32.8                                   |                                            |
| 88453                | 59.5–60.5               | -94                                    | 7        | 564                              | 712                    | 782                              | -29.5                                   |                                            |
| 107434               | 75–85                   | -155                                   | 10       | 1,058                            | 1,296                  | 1,362                            | -32.2                                   | -31.9                                      |
| 88455                | 106.5–110.5             | -212                                   | 14       | 1,535                            | 1,866                  | 2,104                            | -28.4                                   |                                            |
| 107435               | 143–150                 | -299                                   | 7        | 2,780                            | 2,916                  | 3,057                            | -32.0                                   | -31.7                                      |
| 107436               | 258–265                 | -300                                   | 9        | 2,777                            | 2,990                  | 3,141                            | -31.9                                   | -31.9                                      |
| 88463                | 338.5–339.5             | -425                                   | 5        | 4,853                            | 4,935                  | 5,256                            | -29.7                                   |                                            |

Cal, calendar.
